# Supplementary material
Source: HighWire-hosted journal article supplement (https://www.g3journal.org/content/suppl/2015/08/05/g3.115.019877)
Supplement: TableS2.pdf [file TableS2.pdf]

**Table S2 Amino acids and their synonymous codon usages**

| <b>Amino Acid</b> | <b>aa usage</b> | <b>Synonymous codons</b> | <b>codon usage</b> |
|-------------------|-----------------|--------------------------|--------------------|
| Ala               | 0.096           | GCA                      | 0.015              |
|                   |                 | GCC                      | 0.037              |
|                   |                 | GCG                      | 0.028              |
|                   |                 | GCT                      | 0.016              |
| Arg               | 0.063           | CGA                      | <b>0.006</b>       |
|                   |                 | AGA                      | <b>0.009</b>       |
|                   |                 | AGG                      | <b>0.008</b>       |
|                   |                 | CGC                      | 0.021              |
|                   |                 | CGG                      | 0.013              |
|                   |                 | CGT                      | <b>0.007</b>       |
| Asn               | 0.036           | AAC                      | 0.018              |
|                   |                 | AAT                      | 0.018              |
| Asp               | 0.053           | GAC                      | 0.028              |
|                   |                 | GAT                      | 0.025              |
| Cys               | <b>0.015</b>    | TGC                      | 0.009              |
|                   |                 | TGT                      | <b>0.006</b>       |
| Gln               | 0.039           | CAA                      | 0.014              |
|                   |                 | CAG                      | 0.025              |
| Glu               | 0.063           | GAA                      | 0.029              |
|                   |                 | GAG                      | 0.034              |
| Gly               | 0.074           | GGA                      | 0.015              |
|                   |                 | GGC                      | 0.032              |
|                   |                 | GGG                      | 0.014              |
|                   |                 | GGT                      | 0.014              |
|                   |                 | CAC                      | 0.013              |
| His               | 0.023           | CAT                      | 0.010              |
|                   |                 | ATA                      | <b>0.008</b>       |
| Ile               | 0.050           | ATC                      | 0.023              |
|                   |                 | ATT                      | 0.018              |
|                   |                 | CTA                      | <b>0.006</b>       |
| Leu               | 0.100           | CTC                      | 0.022              |
|                   |                 | CTG                      | 0.035              |
|                   |                 | CTT                      | 0.012              |
|                   |                 | TTA                      | 0.011              |
|                   |                 | TTG                      | 0.014              |
|                   |                 | AAA                      | 0.022              |
| Lys               | 0.047           | AAG                      | 0.025              |
| Met               | <b>0.019</b>    | ATG                      | 0.019              |
| Phe               | 0.037           | TTC                      | 0.021              |

|     |              |     |                     |
|-----|--------------|-----|---------------------|
|     |              | TTT | 0.016               |
| Pro | 0.056        | CCA | 0.012               |
|     |              | CCC | 0.015               |
|     |              | CCG | 0.018               |
|     |              | CCT | 0.011               |
| Ser | 0.071        | AGC | 0.016               |
|     |              | AGT | 0.009               |
|     |              | TCA | 0.010               |
|     |              | TCC | 0.013               |
|     |              | TCG | 0.011               |
|     |              | TCT | 0.011               |
| Thr | 0.053        | ACA | 0.011               |
|     |              | ACC | 0.019               |
|     |              | ACG | 0.012               |
|     |              | ACT | 0.010               |
| Trp | <b>0.013</b> | TGG | 0.013               |
| Tyr | 0.027        | TAC | 0.014               |
|     |              | TAT | 0.013               |
| Val | 0.067        | GTA | <b><i>0.008</i></b> |
|     |              | GTC | 0.020               |
|     |              | GTG | 0.026               |
|     |              | GTT | 0.013               |

---

Trp, Cys and Met are the three least used amino acids among all 20 (shown in bold). Of the 8 least used codons (bold and italic), 6 are codons of Arg, Ile and Leu. The other two encode Cys and Val.
